# Supplementary material
Source: PubMed Central journal article supplement (PMC6511475)
Supplement: NIHMS1513205-supplement-2.pdf [file NIHMS1513205-supplement-2.pdf]

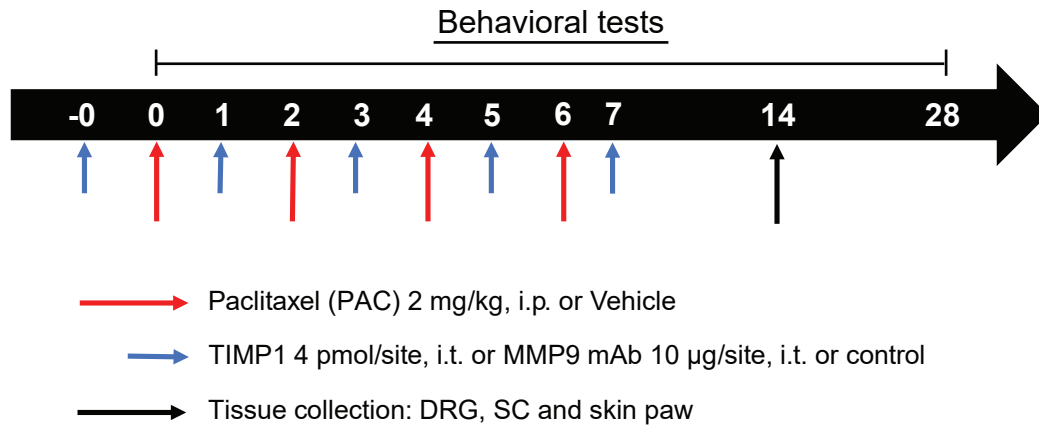

**Suppl. Fig 1:** Animal model of paclitaxel-induced peripheral neuropathy, as well as treatment schemes for intrathecal injections (i.t.) of TIMP1, MMP9 mAb or vehicle and behavioral analyses.
