# Supplementary material
Source: PubMed Central journal article supplement (PMC6511475)
Supplement: NIHMS1513205-supplement-3.pdf [file NIHMS1513205-supplement-3.pdf]

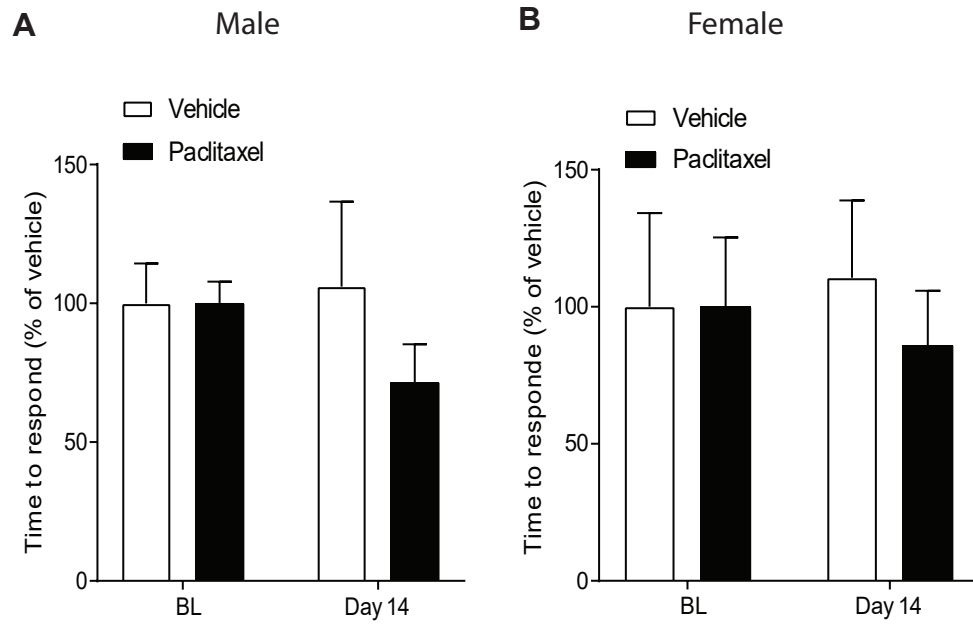

**Suppl. Fig 2:** Effect of paclitaxel on sensorymotor deficits. Mice were treated with paclitaxel or vehicle as described in Suppl. Fig 1, and the time to respond to an adhesive patch on the hind paw was monitored after 14 days in both male (A) and female (B) mice (n=5 per group). Abbreviation: BL = baseline prior to treatment.
